# Supplementary material
Source: Springer Nature journal article supplement (https://www.springermedizin.de/resource/supplementary/13018_2011_346_MOESM2_ESM.pdf/9636876)

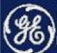

|           |               |
|-----------|---------------|
| TAMEAN    | 16.61 cm/s    |
| VolFlow   | 352.98 ml/min |
| 1 VF Diam | 0.67 cm       |
| 2 Vel     | 51.28 cm/s    |

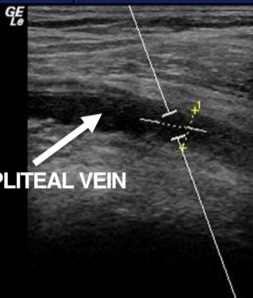

POPLITEAL VEIN

|      |          |
|------|----------|
| B    | CHI      |
| Frq  | 10.0 MHz |
| Gn   | 32       |
| E/A  | 2/1      |
| Map  | H/0/0    |
| D    | 5.0 cm   |
| DR   | 78       |
| FR   | 27 Hz    |
| AO   | 100 %    |
| XBea | m On     |

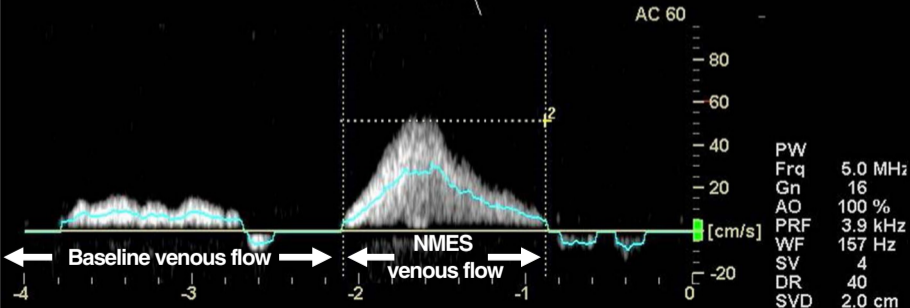

Supplement: MOESM2 [file 9636876]
